# Supplementary material
Source: PubMed Central journal article supplement (PMC6314511)
Supplement: atv-39-89-s001.pdf [file atv-39-89-s001.pdf]

**Supplementary Table I. Correlations with Cholesterol Mass Efflux Capacity and Traditional CVD Risk Factors (not in Table 2) Among Controls**

|                   |             |        | Cholesterol |        |               |         |
|-------------------|-------------|--------|-------------|--------|---------------|---------|
|                   | Efflux Mass | BMI    | Total       | HDL    | Triglycerides | HOMA IR |
| Efflux Mass       | 1.00        |        |             |        |               |         |
|                   |             |        |             |        |               |         |
| BMI               | -0.002      | 1.00   |             |        |               |         |
| P value           | 0.963       |        |             |        |               |         |
|                   |             |        |             |        |               |         |
| Total Cholesterol | 0.08        | -0.07  | 1.00        |        |               |         |
| P value           | 0.036       | 0.057  |             |        |               |         |
|                   |             |        |             |        |               |         |
| HDL               | 0.13        | -0.14  | 0.23        | 1.00   |               |         |
| P value           | <0.001      | <0.001 | <0.001      |        |               |         |
|                   |             |        |             |        |               |         |
| Triglycerides     | -0.002      | 0.03   | 0.36        | -0.31  | 1.00          |         |
| P value           | 0.964       | 0.478  | <0.001      | <0.001 |               |         |
|                   |             |        |             |        |               |         |
| HOMA IR           | -0.03       | 0.33   | -0.06       | -0.29  | 0.23          | 1.00    |
| P value           | 0.484       | <0.001 | 0.117       | <0.001 | <0.001        |         |
|                   |             |        |             |        |               |         |

**Supplemental Table II. Multivariable Linear Regression for Cholesterol Mass Efflux Capacity**

|                         | Efflux Mass (mg/dL) |         |
|-------------------------|---------------------|---------|
|                         | $\beta$ (95% CI)    | P value |
| Age (yrs)               | -0.02 [-0.03,-0.00] | 0.009   |
| Male                    | -0.03 [-0.32,0.27]  | 0.845   |
| Race                    |                     |         |
| Caucasian               | Ref                 |         |
| Chinese                 | 0.12 [-0.30,0.54]   | 0.573   |
| African American        | -0.06 [-0.42,0.31]  | 0.763   |
| Hispanic                | 0.14 [-0.23,0.50]   | 0.471   |
| BMI                     | 0.01 [-0.03,0.04]   | 0.764   |
| Diabetes                | 0.24 [-0.15,0.63]   | 0.220   |
| Alcohol                 |                     |         |
| Never                   | ref                 |         |
| Former                  | 0.16 [-0.26,0.59]   | 0.451   |
| Current                 | 0.27 [-0.10,0.64]   | 0.150   |
| Statins                 | -0.07 [-0.42,0.28]  | 0.704   |
| Total Cholesterol       | 0.002 [-0.00,0.01]  | 0.266   |
| HDL Cholesterol         | 0.02 [0.01,0.03]    | 0.006   |
| Systolic BP             | 0.01 [-0.00,0.01]   | 0.075   |
| Hypertension Medication | 0.005 [-0.28,0.29]  | 0.974   |
| Current Smoker          | -0.05 [-0.42,0.32]  | 0.782   |

R<sup>2</sup> = 0.04 for full model.

**Supplementary Table III. Conditional Logistic Regression Models for Plaque Progression for Model 2 with all Covariates**

|                    | <b>Plaque Progression<br/>(N=814; Events=407)</b> |                  |
|--------------------|---------------------------------------------------|------------------|
|                    | <b>OR (95% CI)</b>                                | <b>p</b>         |
| Age (yrs)          | 1.01 [0.93,1.10]                                  | 0.783            |
| Race               |                                                   |                  |
| Caucasian          | ref                                               |                  |
| Chinese            | 0.28 [0.15,0.50]                                  | <b>&lt;0.001</b> |
| African American   | 0.52 [0.33,0.82]                                  | <b>0.005</b>     |
| Hispanic           | 0.74 [0.47,1.17]                                  | 0.197            |
| BMI                | 0.99 [0.96,1.02]                                  | 0.568            |
| MESA Field Center  |                                                   |                  |
| Wake Forest        | ref                                               |                  |
| Columbia           | 1.47 [0.82,2.65]                                  | 0.193            |
| John's Hopkins     | 1.40 [0.77,2.57]                                  | 0.270            |
| Minnesota          | 2.21 [1.17,4.18]                                  | 0.014            |
| Northwestern       | 1.53 [0.85,2.74]                                  | 0.153            |
| UCLA               | 2.01 [1.05,3.83]                                  | 0.034            |
| Diabetes           |                                                   |                  |
| Normal             | Ref                                               |                  |
| IFG                | 1.12 [0.72,1.73]                                  | 0.616            |
| Untreated Diabetes | 3.58 [0.89,14.40]                                 | 0.072            |
| Treated Diabetes   | 2.08 [1.11,3.88]                                  | <b>0.022</b>     |
| Current Smoker     | 2.50 [1.47,4.26]                                  | <b>0.001</b>     |
| Total Cholesterol  | 1.01 [1.00,1.01]                                  | <b>0.026</b>     |
| HDL Cholesterol    | 0.99 [0.97,1.00]                                  | <b>0.017</b>     |
| Statin Use         | 1.01 [0.63,1.61]                                  | 0.979            |

|                                  |                  |              |
|----------------------------------|------------------|--------------|
| Hypertension Medication          | 0.96 [0.66,1.39] | 0.818        |
| Systolic BP                      | 1.02 [1.01,1.02] | <b>0.001</b> |
| Efflux Mass (mg/dL) (per SD=1.9) | 1.20 [1.02,1.42] | <b>0.030</b> |

**Supplementary Table IV. Conditional Logistic Regression Models for Incident Hard CVD for Model 2 with all Covariates**

|                    | <b>Incident Hard CVD<br/>(N=930; Events=465)</b> |                  |
|--------------------|--------------------------------------------------|------------------|
|                    | <b>OR (95% CI)</b>                               | <b>p</b>         |
| Age (yrs)          | 1.19 [1.11,1.29]                                 | <b>&lt;0.001</b> |
| Race               |                                                  |                  |
| Caucasian          | ref                                              |                  |
| Chinese            | 0.65 [0.37,1.13]                                 | 0.126            |
| African American   | 0.93 [0.61,1.41]                                 | 0.735            |
| Hispanic           | 0.91 [0.58,1.43]                                 | 0.696            |
| BMI                | 1.02 [0.99,1.06]                                 | 0.144            |
| MESA Field Center  |                                                  |                  |
| Wake Forest        | ref                                              |                  |
| Columbia           | 0.90 [0.51,1.59]                                 | 0.714            |
| John's Hopkins     | 0.75 [0.44,1.27]                                 | 0.285            |
| Minnesota          | 1.37 [0.76,2.46]                                 | 0.296            |
| Northwestern       | 0.69 [0.39,1.21]                                 | 0.192            |
| UCLA               | 0.79 [0.44,1.40]                                 | 0.418            |
| Diabetes           |                                                  |                  |
| Normal             | Ref                                              |                  |
| IFG                | 1.05 [0.70,1.59]                                 | 0.800            |
| Untreated Diabetes | 0.83 [0.38,1.81]                                 | 0.644            |
| Treated Diabetes   | 2.35 [1.48,3.73]                                 | <b>&lt;0.001</b> |
| Current Smoker     | 1.72 [1.12,2.63]                                 | <b>0.013</b>     |
| Total Cholesterol  | 1.00 [1.00,1.01]                                 | 0.211            |
| HDL Cholesterol    | 0.99 [0.98,1.01]                                 | 0.319            |
| Statin Use         | 0.86 [0.58,1.28]                                 | 0.459            |

|                                  |                  |                  |
|----------------------------------|------------------|------------------|
| Hypertension Medication          | 1.34 [0.97,1.86] | 0.080            |
| Systolic BP                      | 1.01 [1.01,1.02] | <b>&lt;0.001</b> |
| Efflux Mass (mg/dL) (per SD=1.9) | 0.80 [0.68,0.94] | <b>0.006</b>     |

**Supplemental Table V: Conditional Logistic Regression Model for Incident CHD for Model 2 with all Covariates**

|                                  | <b>CHD (N=540; Events=270)</b> |                |
|----------------------------------|--------------------------------|----------------|
|                                  | <b>OR (95% CI)</b>             | <b>P value</b> |
| Age (yrs)                        | 1.18 [1.07,1.31]               | 0.001          |
| Race                             |                                |                |
| Caucasian                        | ref                            |                |
| Chinese                          | 0.67 [0.33,1.39]               | 0.285          |
| African American                 | 0.90 [0.52,1.54]               | 0.690          |
| Hispanic                         | 0.76 [0.42,1.38]               | 0.372          |
| BMI                              | 1.03 [0.98,1.07]               | 0.237          |
| Site                             |                                |                |
| Wake Forest                      | ref                            |                |
| Columbia                         | 1.26 [0.58,2.71]               | 0.556          |
| John's Hopkins                   | 0.76 [0.38,1.52]               | 0.433          |
| Minnesota                        | 1.48 [0.66,3.32]               | 0.343          |
| Northwestern                     | 0.77 [0.38,1.58]               | 0.478          |
| UCLA                             | 1.06 [0.49,2.27]               | 0.887          |
| Diabetes                         | 1.86 [1.04,3.32]               | 0.036          |
| Current Smoker                   | 3.21 [1.71,6.05]               | <0.001         |
| Total Cholesterol                | 1.00 [0.99,1.01]               | 0.718          |
| HDL Cholesterol                  | 1.00 [0.99,1.02]               | 0.771          |
| Statin Use                       | 1.13 [0.67,1.89]               | 0.642          |
| Hypertension Medication          | 1.31 [0.87,1.97]               | 0.190          |
| Systolic BP                      | 1.01 [1.00,1.02]               | 0.009          |
| Efflux Mass (mg/dL) (per SD=1.9) | 0.69 [0.55,0.86]               | 0.001          |

**Supplemental Table VI: Conditional Logistic Regression Model for Incident Stroke for Model 2 with all Covariates**

|                                  | <b>Stroke (N=390; Events=195)</b> |                |
|----------------------------------|-----------------------------------|----------------|
|                                  | <b>OR (95% CI)</b>                | <b>P value</b> |
| Age (yrs)                        | 1.20 [1.07,1.36]                  | 0.003          |
| Race                             |                                   |                |
| Caucasian                        | ref                               |                |
| Chinese                          | 0.83 [0.33,2.10]                  | 0.688          |
| African American                 | 1.08 [0.54,2.15]                  | 0.831          |
| Hispanic                         | 1.48 [0.69,3.15]                  | 0.310          |
| BMI                              | 1.03 [0.98,1.09]                  | 0.222          |
| Site                             |                                   |                |
| Wake Forest                      | ref                               |                |
| Columbia                         | 0.71 [0.27,1.86]                  | 0.488          |
| John's Hopkins                   | 0.68 [0.26,1.80]                  | 0.440          |
| Minnesota                        | 1.39 [0.48,4.02]                  | 0.539          |
| Northwestern                     | 0.63 [0.23,1.76]                  | 0.378          |
| UCLA                             | 0.46 [0.17,1.23]                  | 0.122          |
| Diabetes                         | 2.30 [1.08,4.90]                  | 0.030          |
| Current Smoker                   | 0.84 [0.44,1.59]                  | 0.582          |
| Total Cholesterol                | 1.01 [0.99,1.02]                  | 0.365          |
| HDL Cholesterol                  | 0.98 [0.96,1.01]                  | 0.133          |
| Statin Use                       | 0.46 [0.22,0.96]                  | 0.039          |
| Hypertension Medication          | 1.22 [0.71,2.12]                  | 0.472          |
| Systolic BP                      | 1.02 [1.00,1.03]                  | 0.005          |
| Efflux Mass (mg/dL) (per SD=1.9) | 0.99 [0.77,1.27]                  | 0.951          |



**Supplemental Table VII: Dose response analysis of the association between CMEC and plaque progression. Possible values for plaque progression were integers ranging from 0 to 10 (based on a plaque score ranging from 0 to 12).<sup>19</sup> Progression=0 are the controls and are not included in the dose response analysis. Groups were defined as follows: 1=1; 2=2; 3-10 =3; >3 the groups were sparse and therefore considered as one category.**

| Amount of Plaque Progression    | Cholesterol Mass Efflux Capacity (CMEC) |         |
|---------------------------------|-----------------------------------------|---------|
|                                 | Mean $\pm$ SD                           | P value |
| All Cases of Plaque Progression | 2.8 $\pm$ 1.8 (n=407)                   | 0.162   |
| 1                               | 3.2 $\pm$ 1.9 (n=169)                   |         |
| 2                               | 2.8 $\pm$ 1.8 (n=98)                    |         |
| >3                              | 3.1 $\pm$ 2.0 (n=140)                   |         |
